# Supplementary material for: Diphenylphosphinoyl chloride as a chlorinating agent ? the selective double activation of 1,2-diols
Source: Royal Society of Chemistry journal article supplement (doi:10.1039/b606881b), 2006-01-01
Supplement: b606881b.pdf [file b606881b.pdf]

## Diphenylphosphinoyl chloride as a chlorinating agent – the selective double activation of 1,2-diols

David J. Fox,\* Daniel Sejer Pedersen, Asger B. Petersen and Stuart Warren

University Chemical Laboratory, Lensfield Road, Cambridge, CB2 1EW, U.K.

EMAIL: djf34@cam.ac.uk

### Supplementary Information

#### Experimental

For reactions conducted under anhydrous conditions glassware was dried overnight in an oven at 130 °C and was allowed to cool in a desiccator over anhydrous KOH. Anhydrous reactions were carried out under argon. Solvents were BOC standard reagent grade and distilled before use. Reagents/solvents for anhydrous reactions were dried as follows: THF was distilled from sodium wire with benzophenone as indicator. Dichloromethane, carbontetrachloride, hexane, acetonitrile, toluene, pyridine, *N,N*-dimethylformamide and triethylamine were dried and stored over 4 Å molecular sieves. Methanol was dried and stored over 3 Å molecular sieves. Sulfate buffer was prepared by dissolving 1.5 mol of Na<sub>2</sub>SO<sub>4</sub> in 0.5 mol H<sub>2</sub>SO<sub>4</sub> and adding water to give a final volume of 2000 cm<sup>3</sup>. Thin layer chromatography (TLC) was carried out on commercially available pre-coated glass plates (Merck 60 F<sub>254</sub>). The quoted *R<sub>f</sub>* values are rounded to the nearest 0.05. Dry Column Vacuum Chromatography (DCVC) was performed according to the published procedure.<sup>1</sup> <sup>1</sup>H, <sup>13</sup>C, APT, DEPT, HMQC and COSY NMR spectra were recorded on Bruker Avance 400 (5 mm QNP probe) and Bruker Avance 500 (5 mm dual <sup>13</sup>C-<sup>1</sup>H cryo probe) Fourier transform spectrometers using an internal deuterium lock. <sup>31</sup>P NMR Spectra were recorded on a Bruker Avance 400 (5 mm QNP probe) Fourier transform spectrometer using 85% H<sub>3</sub>PO<sub>4</sub> as external standard. Solvents were used as internal standards when assigning NMR spectra ( $\delta_{\text{H}}$ : CDCl<sub>3</sub> 7.26 ppm, DMSO-*d*<sub>6</sub> 2.50;  $\delta_{\text{C}}$ : CDCl<sub>3</sub> 77.0 ppm, DMSO-*d*<sub>6</sub> 39.4 ppm). Spectra were processed using Mestre-C software.<sup>2</sup> *J* values are given in Hz and rounded to the nearest 0.5 Hz. LC-MS Was run on a Waters Alliance LC/MS system consisting of a Waters 2795 Separations Module, a Waters 2996 Photodiode Array Detector and a Waters Micromass ZQ on a C18 analytical Reverse Phase Supercosil™ ABZ+PLUS column (3.3 cm × 4.6mm, 3µm) using the following gradient: 0.00-0.70 min 100% solvent A, 0.70-4.20 min 100% solvent A to 100% solvent B, 4.20-7.70 min 100% solvent B, 7.70-8.00 min 100% solvent B to 100% solvent A (solvent A: 10 mM ammonium acetate in water containing 0.1% formic acid; solvent B: 95% acetonitrile in water) with a flow rate of 1 cm<sup>3</sup>/min. EI and LSIMS mass spectra were recorded on a Kratos concept 1H double focusing magnetic sector instrument using a MACH 3 data system. +ESI mass spectra were recorded using a Bruker Bio-Apex II FT-ICR instrument or a Micromass Q-ToF 1 machine. Microanalyses were carried out on a CE440 Elemental Analyser from Exeter Analytical, INC. The calculated values were adjusted for residual solvents. Melting points were measured on a microscope hot stage melting point apparatus (C. Reichert Optische Werke AG) and are uncorrected. Infra-red spectra were recorded using a Perkin Elmer Spectrum One (FT-IR) spectrometer with a universal ATR sampling accessory. Optical rotations were recorded on a Perkin Elmer 241 polarimeter using the sodium D line (589 nm) at 22 °C

and are given in units of  $10^{-1}$  deg  $\text{dm}^2 \text{g}^{-1}$ . X-ray Crystallographic Data was measured on a Nonius Kappa CCD diffractometer at 180(2) K.

**(4*R*,5*S*)-5-Chloro-4-diphenylphosphinoyloxy-1,5-diphenyl-pentan-1-one 5** and **(4*R*,5*R*)-4,5-bis-diphenylphosphinoyloxy-1,5-diphenyl-pentan-1-one 9**: diol<sup>3</sup> **1** (0.50 g, 1.85 mmol) was dissolved in anhydrous pyridine (10  $\text{cm}^3$ ) and diphenylphosphinoyl chloride (1.75 g, 7.40 mmol) was added. The reaction mixture was stirred under argon for 14 hours and transferred to a separatory funnel with water (20  $\text{cm}^3$ ) and extracted with ethyl acetate (50 + 2  $\times$  25  $\text{cm}^3$ ). The combined organic phases were extracted with aqueous sulfate buffer (50  $\text{cm}^3$ ), saturated aqueous  $\text{NaHCO}_3$  (50  $\text{cm}^3$ ), dried ( $\text{Na}_2\text{SO}_4$ ), filtered and concentrated *in vacuo* to give a brown gum. The product was purified by DCVC [id 4 cm; 20  $\text{cm}^3$  fractions; 0-100% EtOAc in hexanes (v/v) – 10% increments; 2.5-12.5% MeOH in EtOAc (v/v) – 2.5% increments; two fractions of each solvent mixture] to give 0.60 g (66%) of *ketone 5* as a yellow amorphous solid and 46 mg (3%) of *bis-phosphinate 9* as a yellow gum; **5**:  $[\alpha]_D^{22} +19.0$  (c. 1.0,  $\text{CHCl}_3$ );  $R_f$  0.65 (EtOAc);  $m/z$  (+ESI) found:  $\text{MH}^+$ , 489.1377. ( $\text{C}_{29}\text{H}_{27}\text{ClO}_3\text{P}$  requires  $M$ , 489.1386); IR  $\nu_{\text{max}}(\text{CHCl}_3)/\text{cm}^{-1}$  1685 (C=O), 1439 (P-Ph) and 1223 (P=O);  $^1\text{H}$  NMR (500 MHz;  $\text{CDCl}_3$ )  $\delta$  7.83-7.79 (2H, m, *ortho*-PhP and/or *ortho*-PhC=O), 7.75-7.71 (4H, m, *ortho*-PhP and/or *ortho*-PhC=O), 7.55-7.47 (3H, m, *para*-PhP and *para*-PhC=O), 7.45-7.27 (13H, m, *meta*-PhP, *meta*-PhC=O and *ortho*-, *meta*- and *para*-PhC), 5.20 (1H, d,  $J$  4.5, CHPh), 4.87 (1H, ddt,  $J$  9.0, 4.5 and 2.5, CHCHPh), 3.05 (1H, ddd,  $J$  18.0, 9.5 and 5.0,  $\text{CH}_a\text{H}_b\text{C}=\text{O}$ ), 2.94 (1H, ddd,  $J$  18.0, 9.5 and 6.0,  $\text{CH}_a\text{H}_b\text{C}=\text{O}$ ), 2.30 (1H, dtd,  $J$  14.5, 9.0 and 5.0,  $\text{CH}_a\text{H}_b\text{CH}_2\text{C}=\text{O}$ ) and 2.17-2.10 (1H, m,  $\text{CH}_a\text{H}_b\text{CH}_2\text{C}=\text{O}$ );  $^{31}\text{P}$  NMR (162 MHz;  $\text{CDCl}_3$ )  $\delta$  32.7;  $^{13}\text{C}$  NMR (126 MHz;  $\text{CDCl}_3$ )  $\delta$  198.8 (C1), 137.0, 136.6 (*ipso*-PhC=O and *ipso*-PhCH), 132.9 (*para*-PhC=O), 132.3 ( $\times 2$ ) (2  $\times$  d,  $J$  2.5 and 3.0, *para*-PhP), 131.7 ( $\times 2$ ) (d,  $J$  138.5, *ipso*-PhP and d,  $J$  10.5, *ortho*-PhP), 131.6 (d,  $J$  10.5, *ortho*-PhP), 131.3 (d,  $J$  134.8, *ipso*-PhP), 128.6 (d,  $J$  13.5, *meta*-PhP), 128.6 (d,  $J$  13.5, *meta*-PhP), 128.5 ( $\times 2$ ), 128.4, 128.0, 127.9 (*ortho*-, *meta*- and *para*-PhCH and *meta*- and *para*-PhC=O), 78.5 (d,  $J$  6.5, C4), 65.8 (d,  $J$  4.0, C5), 34.4 (C2) and 24.3 (d,  $J$  3.5, C3); (Found: C, 68.51; H, 5.31.  $\text{C}_{29}\text{H}_{26}\text{ClO}_3\text{P}\cdot 1 \text{H}_2\text{O}$  requires C, 68.71; H, 5.57). **9**:  $[\alpha]_D^{23} +8.1$  (c. 1.0,  $\text{CHCl}_3$ );  $R_f$  0.35 (EtOAc);  $m/z$  (+ESI) found:  $\text{MH}^+$ , 671.2124. ( $\text{C}_{41}\text{H}_{37}\text{O}_5\text{P}_2$  requires  $M$ , 671.2116); IR  $\nu_{\text{max}}(\text{CHCl}_3)/\text{cm}^{-1}$  1684 (C=O), 1439 (P-Ph) and 1222 (P=O);  $^1\text{H}$  NMR (500 MHz;  $\text{CDCl}_3$ )  $\delta$  7.84-7.76 (4H, m, Ph), 7.73-7.71 (2H, m, Ph), 7.67-7.63 (2H, m, Ph), 7.54-7.44 (6H, m, Ph), 7.41-7.31 (8H, m, Ph), 7.24-7.15 (8H, m, Ph), 5.56 (1H, dd,  $J$  9.5 and 6.0, CHPh), 4.95 (1H, ddt,  $J$  8.5, 6.5 and 3.5, CHCHPh), 2.99 (1H, ddd,  $J$  18.0, 9.5 and 6.0,  $\text{CH}_a\text{H}_b\text{C}=\text{O}$ ), 2.92 (1H, ddd,  $J$  18.0, 9.5 and 5.0,  $\text{CH}_a\text{H}_b\text{C}=\text{O}$ ), 2.21-2.14 (1H, m,  $\text{CH}_a\text{H}_b\text{CH}_2\text{C}=\text{O}$ ) and 1.80 (1H, dddd,  $J$  13.0, 9.0, 8.0 and 5.5,  $\text{CH}_a\text{H}_b\text{CH}_2\text{C}=\text{O}$ );  $^{31}\text{P}$  NMR (162 MHz;  $\text{CDCl}_3$ )  $\delta$  32.4 and 32.3;  $^{13}\text{C}$  NMR (126 MHz;  $\text{CDCl}_3$ )  $\delta$  198.9 (C1), 136.6 (*ipso*-PhC=O), 136.2 (d,  $J$  2.5, *ipso*-PhC), 132.8 (*para*-PhC=O), 132.0 ( $\times 3$ ) (d,  $J$  2.5, *para*-PhP, d,  $J$  2.5, *para*-PhP and d,  $J$  138.0, *ipso*-PhP), 131.9 ( $\times 2$ ), 131.8 ( $\times 2$ ), 131.7 ( $\times 3$ ), 131.6 ( $\times 2$ ), 131.5 (Ph), 131.3 (d,  $J$  141.0, *ipso*-PhP), 130.8 (d,  $J$  137.0, *ipso*-PhP), 130.9 (d,  $J$  133.0, *ipso*-PhP), 128.5, 128.4 ( $\times 2$ ), 128.3, 128.2 ( $\times 2$ ), 128.1, 128.0, 127.9, 127.7 (Ph), 77.9 (t,  $J$  5.5, C5), 77.2 (t,  $J$  6.0, C4), 34.2 (C2) and 25.2 (d,  $J$  2.0, C3).

**tert-Butyl (4R,5S)-5-chloro-4-diphenylphosphinoyloxy-5-phenyl-pentanoate 6:** diol<sup>4</sup> **2** (0.21 g, 0.79 mmol) was dissolved in anhydrous pyridine (5 cm<sup>3</sup>) and diphenylphosphinoyl chloride (0.61 cm<sup>3</sup>, 3.2 mmol) was added under argon. After 29 hours aqueous half-saturated NaHCO<sub>3</sub> (20 cm<sup>3</sup>) was added and the mixture extracted with ethyl acetate (3 × 20 cm<sup>3</sup>). The combined organic phases were concentrated *in vacuo* and the residue dissolved in dichloromethane (20 cm<sup>3</sup>) and extracted with saturated aqueous NaHCO<sub>3</sub> (50 cm<sup>3</sup>). The organic phase was dried (Na<sub>2</sub>SO<sub>4</sub>), filtered and concentrated *in vacuo* to give a yellow gum that was purified by DCVC [id 4 cm; 20 cm<sup>3</sup> fractions; 4 × hexanes; 10-100% EtOAc in hexanes (v/v) – 10% increments; 3 × EtOAc] to give 0.32 g (83%) of *phosphinate 6* as white needles. [α]<sub>D</sub><sup>22</sup> +18 (c. 1.0, CHCl<sub>3</sub>); mp 68-69 °C (EtOAc, hexanes); R<sub>f</sub> 0.30 (40% EtOAc in hexanes, v/v); m/z (+ESI) found: MNa<sup>+</sup>, 507.1454. (C<sub>27</sub>H<sub>30</sub>ClO<sub>4</sub>PNa requires M, 507.1468); IR ν<sub>max</sub>(CHCl<sub>3</sub>)/cm<sup>-1</sup> 1726 (C=O), 1439 (P-Ph) and 1228 (P=O); <sup>1</sup>H NMR (500 MHz; CDCl<sub>3</sub>) δ 7.82-7.78 (2H, m, *ortho*-PhP), 7.71-7.67 (2H, m, *ortho*-PhP), 7.55-7.50 (2H, m, *para*-PhP), 7.47-7.40 (4H, m, *meta*-PhP), 7.30-7.27 (5H, m, Ph), 5.14 (1H, d, J 5.0, PhCH), 4.79-4.74 (1H, m, PhCHCH), 2.37-2.27 (1H, m, CH<sub>a</sub>H<sub>b</sub>C=O), 2.25-2.16 (2H, m, CH<sub>a</sub>H<sub>b</sub>C=O and CH<sub>a</sub>H<sub>b</sub>CH<sub>2</sub>C=O), 1.97-1.89 (1H, m, CH<sub>a</sub>H<sub>b</sub>CH<sub>2</sub>C=O) and 1.34 [9H, s, C(CH<sub>3</sub>)<sub>3</sub>]; <sup>31</sup>P NMR (162 MHz; CDCl<sub>3</sub>) δ 32.6; <sup>13</sup>C NMR (126 MHz; CDCl<sub>3</sub>) δ 171.9 (C1), 137.1 (*ipso*-Ph), 132.3 (d, J 2.5), 132.2 (d, 3.0) (2 × *para*-PhP), 131.7 (d, J 10.5), 131.6 (d, J 10.0) (2 × *ortho*-PhP), 131.4 (×2) (d, J 139.0 and d, J 131.5), 128.6-128.4 (m, 2 × *meta*-PhP and 2 × Ph), 127.8 (*para*-Ph), 80.3 [C(CH<sub>3</sub>)<sub>3</sub>], 78.2 (d, J 6.5, C4), 65.2 (d, J 4.0, C5), 30.8 (C2), 28.0 [C(CH<sub>3</sub>)<sub>3</sub>] and 25.3 (d, J 3.5, C3); (Found: C, 66.86; H, 6.25. C<sub>27</sub>H<sub>30</sub>ClO<sub>4</sub>P requires C, 66.87; H, 6.24%).

**(1S,2R)-1-Chloro-1-phenyl-2-diphenylphosphinoyloxy-propane 7:** to a stirred solution of diol<sup>5</sup> **3** (1.23 g, 8.08 mmol) in pyridine (50 cm<sup>3</sup>) under argon was added diphenylphosphinoyl chloride (4.38 cm<sup>3</sup>, 22.3 mmol) and the solution was stirred for 48 hours before it was quenched with half-saturated aqueous NaHCO<sub>3</sub> (50 cm<sup>3</sup>) and brine (50 cm<sup>3</sup>). The mixture was extracted with EtOAc (80 cm<sup>3</sup> + 50 cm<sup>3</sup> + 20 cm<sup>3</sup>) and the combined organic phases were evaporated *in vacuo*. Purification by DCVC [id 4 cm; 20 cm<sup>3</sup> fractions; 0-100% EtOAc in petrol ether (60-80 °C) (v/v) – 10% increments] gave *chloride 7* (1.79 g, 60%) as a clear colourless oil; [α]<sub>D</sub><sup>22</sup> +18.4 (c. 0.7, CHCl<sub>3</sub>); R<sub>f</sub> 0.40 [30% petrol ether (60-80 °C) in EtOAc, v/v]; <sup>1</sup>H NMR (400 MHz, CDCl<sub>3</sub>) δ 7.76-7.70 (2H, m, *ortho*-PhP), 7.59-7.53 (2H, m, *ortho*-PhP), 7.48-7.24 (11H, m, Ph), 5.05 (1H, d, J 5.5, CHCl), 4.81 (1H, dq, J 9.0 and 6.0, CHO), 1.42 (d, 3H, J 6.0, CH<sub>3</sub>); <sup>31</sup>P NMR (162 MHz, CDCl<sub>3</sub>) δ 32.1; <sup>13</sup>C NMR (101 MHz, CDCl<sub>3</sub>) δ 137.6, 132.2 (d, J 11.5), 132.1 (d, J 11.5), 131.9 (d, J 138.5), 131.6 (d, J 10.0), 131.6 (d, J 10.5), 131.4 (d, J 137.0), 128.5 (×2), 128.4 (d, J 13.0), 128.4 (d, J 13.5), 128.0, 75.6 (d, J 6.0), 66.5 (d, J 6.5), 18.0 (d, J 2.5) (CH<sub>3</sub>); m/z (+ESI) found: MH<sup>+</sup> 371.0958 (C<sub>21</sub>H<sub>20</sub>O<sub>2</sub>ClP<sup>+</sup> requires 371.0962); (found: C, 66.32%; H, 5.36%; C<sub>21</sub>H<sub>20</sub>O<sub>2</sub>ClP·0.5 H<sub>2</sub>O requires C, 66.41%; H, 5.57%).

**(1R,2S)-2-Chloro-1,2-diphenyl-1-diphenylphosphinoyloxyethane 8:** to a stirred solution of diol<sup>5</sup> **4** (0.429 g, 2.0 mmol) in pyridine (10 cm<sup>3</sup>) under argon was added diphenylphosphinoyl chloride (1.53 cm<sup>3</sup>, 8.0 mmol) and the solution was stirred for 48 hours before it was quenched with half-saturated aqueous NaHCO<sub>3</sub> (40 cm<sup>3</sup>). The mixture was extracted with EtOAc (3 × 40 cm<sup>3</sup>) and the combined organic phases were evaporated *in vacuo*. The residue was dissolved in dichloromethane (50 cm<sup>3</sup>) and

saturated aqueous NaHCO<sub>3</sub> (50 cm<sup>3</sup>), the organic phase dried with Na<sub>2</sub>SO<sub>4</sub>, filtered, and evaporated *in vacuo*. Purification by DCVC [id 4 cm; 20 cm<sup>3</sup> fractions; 0-100% EtOAc in petrol ether (60-80 °C) (v/v) – 10% increments; 2 × EtOAc] gave *chloride 8* (0.617 g, 71%). A sample was recrystallised from CHCl<sub>3</sub> : petrol ether (60-80 °C) to give a colourless crystalline solid;  $[\alpha]_{\text{D}}^{22} +22.8$  (c. 0.75, CHCl<sub>3</sub>); mp 172–174 °C; *R*<sub>f</sub> 0.40 [40% petrol ether (60-80 °C) in EtOAc, v/v]; <sup>1</sup>H NMR (400 MHz, CDCl<sub>3</sub>) δ 7.48-7.44 (5H, m, Ph), 7.35-6.93 (15H, m, Ph), 5.73 (1H, dd, *J* 9.0, 6.5, CHO), 5.28 (1H, d, *J* 6.5, CHCl); <sup>31</sup>P NMR (162 MHz, CDCl<sub>3</sub>) δ 33.5; <sup>13</sup>C NMR (101 MHz, CDCl<sub>3</sub>) δ 137.3, 136.3 (d, *J* 2.0), 132.1 (d, *J* 3.0), 131.9 (d, *J* 3.0), 131.7 (d, *J* 10.5), 131.4 (d, *J* 138.5), 131.4 (d, *J* 10.5), 131.1 (d, *J* 135.5), 128.7, 128.5, 128.3, 128.3 (d, *J* 13.5), 128.1, 128.1 (d, *J* 13.5), 127.8, 80.0 (d, *J* 5.5), 65.5 (d, *J* 6.5); *m/z* (+ESI) found: MH<sup>+</sup> 433.1124 (C<sub>26</sub>H<sub>23</sub>ClO<sub>2</sub>P<sup>+</sup> requires 433.1119); (found: C, 71.80%; H, 5.15%; C<sub>26</sub>H<sub>22</sub>ClO<sub>2</sub>P 1.5 H<sub>2</sub>O requires C, 71.54%; H, 5.17%).

**(2*R*,3*S*)-Methyl 3-chloro-2-bis(diphenylphosphinoyloxy)-3-phenylpropanoate 11, (2*R*,3*R*)-methyl 2-chloro-3-bis(diphenylphosphinoyloxy)-3-phenylpropanoate 12 and (2*S*,3*R*)-methyl 2,3-bis(diphenylphosphinoyloxy)-3-phenylpropanoate 13:** to a stirred solution of diol<sup>6</sup> **10** (0.098 g, 0.5 mmol) in pyridine (5 cm<sup>3</sup>) under argon was added diphenylphosphinoyl chloride (0.38 cm<sup>3</sup>, 2.0 mmol) and the solution was stirred for 48 hours before it was quenched with half-saturated aqueous NaHCO<sub>3</sub> (10 cm<sup>3</sup>). The mixture was extracted with EtOAc (3 × 20 cm<sup>3</sup>) and the combined organic phases were evaporated *in vacuo*. The residue was dissolved in dichloromethane (25 cm<sup>3</sup>) and saturated aqueous NaHCO<sub>3</sub> (40 cm<sup>3</sup>), the organic phase dried with Na<sub>2</sub>SO<sub>4</sub>, filtered, and evaporated *in vacuo*. Purification by DCVC [id 4 cm; 20 cm<sup>3</sup> fractions; 0-100% EtOAc in petrol ether (60-80 °C) (v/v) – 10% increments; then 5-20% MeOH in EtOAc (v/v) – 5% increments] gave *bis-phosphinate 13* as a light yellow oil (0.073 g, 24%) and a mixture of *chloro-phosphinates 11* and **12** (**11:12** 1:2.5 by <sup>1</sup>H NMR) (0.115 g, 56%). **11** and **12** <sup>1</sup>H NMR (400 MHz, CDCl<sub>3</sub>) 7.80-7.22 (m, Ph, both isomers), 5.76 (1H, dd, *J* 9.5, 8.0, PhCHOP, minor isomer), 5.25 (1H, d, *J* 8.0, PhCHCl, major isomer), 5.17 (1H, dd, *J* 9.5, 8.0, POCHCO<sub>2</sub>, major isomer), 4.75 (1H, dd, *J* 8.0, ClCHCO<sub>2</sub>, minor isomer), 3.69 (3H, s, OCH<sub>3</sub> minor isomer) and 3.60 (3H, s, OCH<sub>3</sub> major isomer); *m/z* (+ESI) found: MH<sup>+</sup> 435.1474 (C<sub>23</sub>H<sub>29</sub>O<sub>4</sub>ClP<sup>+</sup> requires 435.1492). A sample of *bis-phosphinate 13* was recrystallised from CHCl<sub>3</sub> : petrol ether (60-80 °C);  $[\alpha]_{\text{D}}^{22} -12.0$  (c. 0.43, CHCl<sub>3</sub>); mp 145.5-147.7 °C; *R*<sub>f</sub> 0.05 [40% petrol ether (60-80 °C) in EtOAc, v/v]; <sup>1</sup>H NMR (400 MHz, CDCl<sub>3</sub>) δ 7.85-7.75 (4H, m, Ph), 7.52-7.32 (12H, m, Ph), 7.25-7.09 (9H, m, Ph), 5.81 (1H, dd, *J* 9.5 and 5.5, CHPh), 5.10 (1H, dd, *J* 8.5 and 5.5, CHCO), 3.33 (3H, s, CH<sub>3</sub>); <sup>31</sup>P NMR (162 MHz, CDCl<sub>3</sub>) δ 35.2 and 33.3; <sup>13</sup>C NMR (101 MHz, CDCl<sub>3</sub>) δ 167.7, 135.3 (d, *J* 1.5), 132.3, 132.2 (×2), 132.1 (×2), 132.0 (×3), 131.9 (×2), 131.8 (×2), 131.7 (×2), 131.3, 130.5, 130.4 (×2), 129.9, 128.7, 128.4 (×2), 128.3 (×2), 128.2 (×3), 128.0, 127.2, 77.0 (t, *J* 26.0), 76.2 (t, *J* 25.0); *m/z* (+ESI) found: MH<sup>+</sup> 597.1602 (C<sub>34</sub>H<sub>31</sub>O<sub>6</sub>P<sub>2</sub><sup>+</sup> requires 597.1590); (found: C, 67.89%; H, 5.10%; C<sub>34</sub>H<sub>30</sub>O<sub>6</sub>P<sub>2</sub> 0.25 H<sub>2</sub>O requires C, 67.94%; H, 5.11%).

**(2*R*,3*R*)-Ethyl 2-chloro-3-(diphenylphosphinoyloxy)-4-methylpentanoate 15:** to a stirred solution of diol<sup>7</sup> **14** (0.600 g, 3.4 mmol) in pyridine (15 cm<sup>3</sup>) under argon was added diphenylphosphinoyl chloride

(2.6 cm<sup>3</sup>, 14 mmol) and the solution was stirred for 48 hours before it was quenched with half-saturated aqueous NaHCO<sub>3</sub> (30 cm<sup>3</sup>). The mixture was extracted with EtOAc (3 × 40 cm<sup>3</sup>) and the combined organic phases were evaporated *in vacuo*. The residue was dissolved in CH<sub>2</sub>Cl<sub>2</sub> (40 cm<sup>3</sup>) and saturated aqueous NaHCO<sub>3</sub> (60 cm<sup>3</sup>), the organic phase dried with Na<sub>2</sub>SO<sub>4</sub>, filtered, and evaporated *in vacuo*. Purification by DCVC [id 4 cm; 20 cm<sup>3</sup> fractions; 0-100% EtOAc in petrol ether (60-80 °C) (v/v) – 10% increments; then 5-20% MeOH in EtOAc (v/v) – 5% increments] gave *chloride 15* as colourless crystals (0.610 g, 45%); [ $\alpha$ ]<sub>D</sub><sup>22</sup> –6.6 (c. 0.80, CHCl<sub>3</sub>); mp 66-68 °C; R<sub>f</sub> 0.40 [40% petrol ether (60-80 °C) in EtOAc, v/v]; <sup>1</sup>H NMR (400 MHz, CDCl<sub>3</sub>)  $\delta$  7.84-7.74 (4H, m, Ph), 7.51-7.37 (6H, m, Ph), 4.90-4.82 (1H, m, CHOP), 4.58 (1H, d, *J* 6.5, CHCl), 3.96-3.78 2H, (m, CH<sub>2</sub>), 2.27 (1H, dq, *J* 13.5 and 6.5, CHCH<sub>3</sub>), 1.19-1.11 (3H, m, CH<sub>3</sub>CH<sub>2</sub>), 0.94 (3H, d, *J* 7.0, CH<sub>3</sub>CH), 0.83 (3H, d, *J* 7.0, CH<sub>3</sub>CH); <sup>31</sup>P NMR (162 MHz, CDCl<sub>3</sub>)  $\delta$  32.0; <sup>13</sup>C NMR (101 MHz, CDCl<sub>3</sub>)  $\delta$  167.3, 132.2 (d, *J* 137.0 Hz), 132.1 (d, *J* 137.0), 132.1 (d, *J* 2.5), 131.5 (d, *J* 10.5), 128.4 (d, *J* 13.5), 80.4 (d, *J* 7.0), 62.2, 58.5 (d, *J* 3.5), 29.8 (d, *J* 3.5), 19.0, 17.0, 13.7; *m/z* (+ESI) found MH<sup>+</sup> 395.1163 (C<sub>20</sub>H<sub>25</sub>ClO<sub>4</sub>P<sup>+</sup> requires 395.1174); (found: C, 60.71%; H, 6.08%; C<sub>20</sub>H<sub>24</sub>ClO<sub>4</sub>P requires C, 60.84%; H, 6.13%).

**(1*R*,2*R*)-1-Diphenylphosphinoyloxy-2-hydroxy-1,2-diphenylethane 16:** to a stirred solution of diol **4** (0.214 g, 1.0 mmol) in pyridine (5 cm<sup>3</sup>) under argon was added diphenylphosphinoyl chloride (0.19 cm<sup>3</sup>, 1.0 mmol) and the solution was stirred for 48 hours before it was quenched with half-saturated aqueous NaHCO<sub>3</sub> (20 cm<sup>3</sup>). The mixture was extracted with EtOAc (2 × 30 + 20 cm<sup>3</sup>) and the combined organic phases were evaporated *in vacuo*. The residue was dissolved in dichloromethane (25 cm<sup>3</sup>) and saturated aqueous NaHCO<sub>3</sub> (40 cm<sup>3</sup>), the organic phase dried with Na<sub>2</sub>SO<sub>4</sub>, filtered, and evaporated *in vacuo*. Purification by DCVC [id 4 cm; 20 cm<sup>3</sup> fractions; 0-100% EtOAc in petrol ether (60-80 °C) (v/v) – 10% increments] gave *phosphinate 16* as a clear colourless oil (0.100 g, 24%). A sample of **16** was recrystallised from CHCl<sub>3</sub> : petrol ether (60-80 °C); [ $\alpha$ ]<sub>D</sub><sup>22</sup> +75.1 (c. 0.80, CHCl<sub>3</sub>); mp 154.9-157.5 °C; R<sub>f</sub> 0.25 [60% petrol ether (60-80 °C) in EtOAc v/v]; <sup>1</sup>H NMR (400 MHz, CDCl<sub>3</sub>)  $\delta$  7.87-7.81 (2H, m, Ph), 7.68-7.63 (2H, m, Ph), 7.56-7.48 (4H, m, Ph), 7.36-7.31 (2H, m, Ph), 7.20-7.03 (6H, m, Ph), 6.99-6.97 (2H, m, Ph), 6.92-6.90 (2H, m, Ph), 5.22 (1H, br s, OH), 5.11 (1H, t, *J* 8.5, CHOP), 4.99 (1H, d, *J* 8.0, CHOH); <sup>31</sup>P NMR (162 MHz, CDCl<sub>3</sub>)  $\delta$  37.2; <sup>13</sup>C NMR (101 MHz, CDCl<sub>3</sub>)  $\delta$  138.9, 136.9 (d, *J* 6.0), 132.6 (d, *J* 3.0), 132.4 (d, *J* 3.0), 132.3 (d, *J* 10.5), 131.4 (d, *J* 10.5), 131.1 (d, *J* 165.0), 129.7 (d, *J* 151.0), 128.6 (d, *J* 13.5), 186.6 (d, *J* 13.0), 128.2, 128.0, 127.8, 127.6, 127.5, 127.2, 85.6 (d, *J* 7.0), 78.4 (d, *J* 2.0); *m/z* (ESI+): found: MH<sup>+</sup> 415.1457 (C<sub>26</sub>H<sub>24</sub>O<sub>3</sub>P<sup>+</sup> requires 415.1458); (found: C, 75.19%; H, 5.61%; C<sub>26</sub>H<sub>23</sub>O<sub>3</sub>P 0.25 H<sub>2</sub>O requires C, 75.35%; H, 5.59%).

**(1*R*,2*R*)-1,2-Bis(diphenylphosphinoyloxy)-1,2-diphenylethane 17:** to a stirred solution of diol **4** (0.214 g, 1.0 mmol) in CH<sub>2</sub>Cl<sub>2</sub> (10 cm<sup>3</sup>) under argon were added triethylamine (0.28 cm<sup>3</sup>, 2.1 mmol), DMAP (0.024 g, 0.2 mmol), and diphenylphosphinoyl chloride (0.19 cm<sup>3</sup>, 1.0 mmol) and the solution was stirred for 46 hours before water (20 cm<sup>3</sup>) and dichloromethane (25 cm<sup>3</sup>) were added, the aqueous phase was extracted with dichloromethane (2 × 25 cm<sup>3</sup>) and the combined organic phases were

extracted with sulfate buffer (20 cm<sup>3</sup>) and saturated aqueous NaHCO<sub>3</sub> (20 cm<sup>3</sup>). The organic phase was dried with Na<sub>2</sub>SO<sub>4</sub>, filtered, and evaporated *in vacuo*. Purification by DCVC [id 4 cm; 20 cm<sup>3</sup> fractions; 0-100% EtOAc in petrol ether (60-80 °C) (v/v) – 10% increments; then 5-20% MeOH in EtOAc (v/v) – 10% increments] gave *bis-phosphinate* **17** as clear colourless oil (0.220 g, 36%); [ $\alpha$ ]<sub>D</sub><sup>22</sup> +53.2 (c. 0.95, CHCl<sub>3</sub>); R<sub>f</sub> 0.35 (EtOAc); <sup>1</sup>H NMR (400 MHz, CDCl<sub>3</sub>)  $\delta$  7.81-7.76 (4H, m, Ph), 7.55-7.49 (4H, m, Ph), 7.40-7.35 (2H, m, Ph), 7.28-7.23 (6H, m, Ph), 7.14-7.10 (4H, m, Ph), 7.02-6.88 (10H, m, Ph), 5.75-5.67 (2H, m, CHOP); <sup>31</sup>P NMR (162 MHz, CDCl<sub>3</sub>)  $\delta$  32.5; <sup>13</sup>C NMR (101 MHz, CDCl<sub>3</sub>)  $\delta$  135.9 (d, *J* 1.5), 132.2, 132.0, 131.9 (×2), 131.8, 131.7 (×3), 131.6, 131.5 (d, *J* 140.0), 131.3 (d, *J* 133.5), 128.3, 128.2, 128.1, 128.0, 127.9, 127.8, 127.7, 79.4 (t, *J* 6.0); *m/z* (ESI+) found: MH<sup>+</sup> 615.1848 (C<sub>38</sub>H<sub>33</sub>O<sub>4</sub>P<sub>2</sub><sup>+</sup> requires 615.1849); (found: C, 73.46%; H, 5.27%; C<sub>38</sub>H<sub>32</sub>O<sub>4</sub>P<sub>2</sub> 0.33 H<sub>2</sub>O requires C, 73.54%; H, 5.31%).

**(1R,2S)-2-Chloro-1,2-diphenyl-1-diphenylphosphinoyloxyethane 8**: to a stirred solution of hydroxy-phosphinate **16** (60 mg, 0.145 mmol) in pyridine (5 cm<sup>3</sup>) under argon was added diphenylphosphinoyl chloride (0.58 mmol) and the solution was stirred for 48 hours before it was quenched with half-saturated aqueous NaHCO<sub>3</sub> (20 cm<sup>3</sup>). The mixture was extracted with EtOAc (3 × 20 cm<sup>3</sup>) and the combined organic phases were evaporated *in vacuo*. The residue was dissolved in dichloromethane (50 cm<sup>3</sup>) and saturated aqueous NaHCO<sub>3</sub> (50 cm<sup>3</sup>), the organic phase dried with Na<sub>2</sub>SO<sub>4</sub>, filtered, and evaporated *in vacuo* to give crude chloro-phosphinate **8** (>95% conversion by <sup>1</sup>H NMR).

**Reaction of diol 4 with Ph<sub>2</sub>PCL<sub>3</sub> in pyridine**: to a solution of Ph<sub>2</sub>PCL<sub>3</sub> (0.72 cm<sup>3</sup>, 4.0 mmol) in CCl<sub>4</sub> (20 cm<sup>3</sup>) under argon at –15 °C was added SO<sub>2</sub>Cl<sub>2</sub> (0.32 cm<sup>3</sup>, 4.0 mmol) (dropwise), and the mixture was stirred for 2 hours at –15 to –10 °C.<sup>8</sup> The solvent was removed *in vacuo* to give Ph<sub>2</sub>PCL<sub>3</sub> as a white crystalline solid. The solid was dissolved in pyridine under argon and diol **4** (0.86 g, 4.0 mmol) was added. The reaction was stirred at ambient temperature for 48 hours. Evaporation of the pyridine gave a crude product containing diol **4**, chloro-phosphinate **8** and hydroxy-phosphinate **16** in a 43:31:26 ratio (by <sup>1</sup>H NMR).

**(4R,5R)-5-Azido-1,5-diphenyl-4-diphenylphosphinoyloxy-pentan-1-one 21**: chloride **5** (0.25 g, 0.51 mmol) was dissolved in anhydrous DMF (5 cm<sup>3</sup>). To the stirred solution, at room temperature under argon, sodium azide (40 mg, 0.62 mmol) was added and the reaction mixture heated to 120 °C. After 28 hours the reaction was transferred to a separatory funnel with water (25 cm<sup>3</sup>) and brine (10 cm<sup>3</sup>) and extracted with ethyl acetate (50 + 2 × 25 cm<sup>3</sup>). The combined organic phases were extracted with aqueous sulfate buffer (25 cm<sup>3</sup>), saturated aqueous NaHCO<sub>3</sub> (25 cm<sup>3</sup>), dried (Na<sub>2</sub>SO<sub>4</sub>), filtered and concentrated *in vacuo* to give a yellow gum. The product was purified by DCVC [id 4 cm; 20 cm<sup>3</sup> fractions; 2 × hexanes; 10-100% EtOAc in hexanes (v/v) – 10% increments; 5 × EtOAc] to give 0.17 g (67%) of *azide* **21** as yellow needles. [ $\alpha$ ]<sub>D</sub><sup>22</sup> –62 (c. 1.2, CHCl<sub>3</sub>); mp 91-92 °C (EtOAc, hexanes); R<sub>f</sub> 0.35 (50% EtOAc in hexanes, v/v); *m/z* (+ESI) found: MNa<sup>+</sup>, 518.1619. (C<sub>29</sub>H<sub>26</sub>N<sub>3</sub>O<sub>3</sub>PNa requires *M*, 518.1609); IR  $\nu_{\max}$ (CHCl<sub>3</sub>)/cm<sup>-1</sup> 2103 (N<sub>3</sub>), 1684 (C=O) 1439 (P-Ph) and 1224 (P=O); <sup>1</sup>H NMR (500

MHz; CDCl<sub>3</sub>)  $\delta$  7.87-7.83 (2H, m, *ortho*-PhC=O or *ortho*-PPh), 7.77-7.71 (4H, m, *ortho*-PhC=O or *ortho*-PPh), 7.53-7.47 (3H, m, Ph), 7.45-7.31 (11H, m, Ph), 4.97 (1H, d, *J* 7.0, PhCH), 4.73 (1H, tdd, *J* 9.0, 7.0 and 3.0, PhCHCH), 3.07-2.89 (2H, m, CH<sub>2</sub>C=O), 2.08-2.02 (1H, m, CH<sub>a</sub>H<sub>b</sub>CH<sub>2</sub>C=O) and 1.88-1.81 (1H, m, CH<sub>a</sub>H<sub>b</sub>CH<sub>2</sub>C=O); <sup>31</sup>P NMR (162 MHz; CDCl<sub>3</sub>)  $\delta$  32.8; <sup>13</sup>C NMR (126 MHz; CDCl<sub>3</sub>)  $\delta$  198.8 (C1), 136.5, 135.5 (2  $\times$  *ipso*-PhC), 133.0 (*para*-PhC=O), 132.2 ( $\times$ 3) (d, *J* 91.5, *ipso*-PPh, d, *J* 2.5, *para*-PhP and d, *J* 3.0, *para*-PhP), 131.7 (d, *J* 10.5, *ortho*-PhP), 131.6 (d, *J* 10.0, *ortho*-PhP), 131.1 (d, *J* 89.0, *ipso*-PhP), 128.8 (PhC), 128.6 (d, *J* 13.0, *meta*-PhP), 128.4 (d, *J* 13.5, *meta*-PhP), 128.4, 128.0, 127.9 (PhC), 77.6 (d, *J* 7.0, C4), 69.4 (d, *J* 4.1, C5), 34.4 (C2), 26.3 (d, *J* 3.0, C3); (Found: C, 70.29; H, 5.31. C<sub>29</sub>H<sub>26</sub>N<sub>3</sub>O<sub>3</sub>P requires C, 70.29; H, 5.29%).

**(1*R*,2*R*)-1-Azido-2-diphenylphosphinoyloxy-1-phenylpropane 22**: to a stirred solution of chlorophosphinate **7** (0.370 g, 1.0 mmol) in DMF (20 cm<sup>3</sup>) under argon was added sodium azide (0.260 g, 4.0 mmol) and the mixture was stirred at 120 °C. After 48 hours heating was stopped, water (20 cm<sup>3</sup>) and brine (20 cm<sup>3</sup>) were added and the aqueous phase was extracted with EtOAc (3  $\times$  25 cm<sup>3</sup>), the combined organic phases were extracted with sulfate buffer (25 cm<sup>3</sup>) followed by saturated aqueous NaHCO<sub>3</sub> (25 cm<sup>3</sup>), dried with Na<sub>2</sub>SO<sub>4</sub>, filtered, and evaporated *in vacuo*. Purification by DCVC [id 4 cm; 20 cm<sup>3</sup> fractions; 0-100% EtOAc in petrol ether (60-80 °C) (v/v) – 10% increments] gave *azido-phosphinate 22* as a clear light yellow oil (0.280 g, 74%); [ $\alpha$ ]<sub>D</sub><sup>22</sup> –94.5 (c. 1.7, CHCl<sub>3</sub>); *R*<sub>f</sub> 0.30 [40% petrol ether (60-80 °C) in EtOAc, v/v]; <sup>1</sup>H NMR (400 MHz, CDCl<sub>3</sub>)  $\delta$  7.87-7.72 (4H, m, Ph), 7.45-7.31 (6H, m, Ph), 7.30-7.19 (5H, m, Ph), 4.71-4.59 (2H, m, CH), 1.18 (3H, d, *J* 6.0, CH<sub>3</sub>); <sup>31</sup>P NMR (162 MHz, CDCl<sub>3</sub>)  $\delta$  32.1; <sup>13</sup>C NMR (101 MHz, CDCl<sub>3</sub>)  $\delta$  135.7, 132.2 (d, *J* 139.5), 132.2 (d, *J* 3.0), 132.1 (d, *J* 3.0), 131.7 (d, *J* 10.5), 131.5 (d, *J* 10.0), 131.4 (d, *J* 136.0), 128.7 ( $\times$ 2), 128.5 (d, *J* 13.0), 128.4 (d, *J* 13.5), 127.8, 74.9 (d, *J* 6.5), 70.5 (d, *J* 6.5), 19.0 (d, *J* 1.5); *m/z* (ESI+) found: MH<sup>+</sup> 378.1374 (C<sub>21</sub>H<sub>21</sub>N<sub>3</sub>O<sub>2</sub>P<sup>+</sup> requires 378.1366); (found: C, 65.43%; H, 5.36%; N, 10.79%; C<sub>21</sub>H<sub>20</sub>N<sub>3</sub>O<sub>2</sub>P 0.5 H<sub>2</sub>O requires C, 65.28%; H, 5.48%; N, 10.88%).

**(1*R*,2*R*)-2-Azido-1,2-diphenyl-1-(diphenylphosphinoyloxy)ethane 23**: to a stirred solution of chlorophosphinate **8** (0.110 g, 0.25 mmol) in DMF (10 cm<sup>3</sup>) under argon was added sodium azide (0.066 g, 1.0 mmol) and the mixture was stirred at 120 °C. After 48 hours heating was stopped, water (10 cm<sup>3</sup>) and brine (10 cm<sup>3</sup>) were added and the aqueous phase was extracted with EtOAc (2  $\times$  30 + 10 cm<sup>3</sup>), the combined organic phases were extracted with sulfate buffer (30 cm<sup>3</sup>), saturated aqueous NaHCO<sub>3</sub> (30 cm<sup>3</sup>), dried with Na<sub>2</sub>SO<sub>4</sub>, filtered, and evaporated *in vacuo*. Purification by DCVC [id 4 cm; 20 cm<sup>3</sup> fractions; 0-100% EtOAc in petrol ether (60-80 °C) (v/v) – 10% increments] gave *azido-phosphinate 23* as a clear light yellow oil (0.060 g, 55%); [ $\alpha$ ]<sub>D</sub><sup>22</sup> –44.4 (c. 0.23, CHCl<sub>3</sub>); *R*<sub>f</sub> 0.35 [40% petrol ether (60-80 °C) in EtOAc, v/v]; <sup>1</sup>H NMR (400 MHz, CDCl<sub>3</sub>)  $\delta$  7.88-7.80 (2H, m, Ph), 7.61-7.41 (5H, m, Ph), 7.39-7.31 (1H, m, Ph), 7.26-6.93 (12H, m, Ph), 5.48 (1H, dd, *J* 9.5 and 7.5, CHOP), 4.97 (1H, d, *J* 7.5, CHN<sub>3</sub>); <sup>31</sup>P NMR (162 MHz, CDCl<sub>3</sub>)  $\delta$  33.4; <sup>13</sup>C NMR (101 MHz, CDCl<sub>3</sub>)  $\delta$  136.3 (d, *J* 2.5), 135.0, 132.2 (d, *J* 3.0), 131.9 (d, *J* 3.0), 131.8 (d, *J* 10.5 Hz), 131.6 (d, *J* 139.5), 131.6 (d, *J* 10.5), 131.1 (d, *J* 134.5), 128.5, 128.4 ( $\times$ 2), 128.2 ( $\times$ 3), 128.0, 127.9, 127.5, 79.8 (d, *J* 6.0), 70.7 (d, *J* 5.5); *m/z*

(ESI+) found:  $MH^+$  440.1541 ( $C_{26}H_{23}N_3O_2P^+$  requires 440.1522); (found: C, 69.72%; H, 5.07%; N, 8.87;  $C_{26}H_{22}N_3O_2P \cdot 2/3H_2O$  requires C, 69.17%; H, 5.21%; N, 9.31%).

**(4R,5R)-5-Azido-4-hydroxy-1,5-diphenylpentan-1-one 24**: to a stirred solution of azido-phosphinate **21** (0.049 g, 0.10 mmol) in methanol (5 cm<sup>3</sup>) under argon was added potassium carbonate (0.055 g, 0.40 mmol). After stirring overnight the reaction mixture was evaporated to dryness and the residue purified by DCVC [id 4 cm; 20 cm<sup>3</sup> fractions; 0-100% EtOAc in petrol ether (60-80 °C) (v/v) – 10% increments] to give *azido-alcohol 24* as a clear colourless oil (22 mg, 75%);  $[\alpha]_D^{22}$  –90.0 (c. 1.2, CHCl<sub>3</sub>);  $R_f$  0.50 [50% petrol ether (60-80 °C) in EtOAc, v/v]; <sup>1</sup>H NMR (500 MHz, CDCl<sub>3</sub>)  $\delta$  7.92-7.88 (2H, m, Ph), 7.54-7.49 (1H, m, Ph), 7.44-7.29 (7H, m, Ph), 4.40 (1H, d,  $J$  7.5, CHN<sub>3</sub>), 3.85-3.78 (1H, m, CHOH), 3.18-3.01 (2H, m, CH<sub>2</sub>CHOH), 2.68 (1H, br s, OH), 1.78-1.68 (2H, m, CH<sub>2</sub>C=O); <sup>13</sup>C NMR (126 MHz, CDCl<sub>3</sub>)  $\delta$  200.0, 136.7, 136.3, 133.1, 129.0, 128.8, 128.5, 128.4, 128.0, 127.8, 73.9, 72.1, 60.4, 34.6, 27.3;  $m/z$  (ESI+) found:  $MNa^+$  318.1201 ( $C_{17}H_{17}N_3O_2Na^+$  requires 318.1213).

**(1R,2R)-1-Azido-1-phenylpropan-2-ol 25**: to a stirred solution of azido-phosphinate **22** (0.034 g, 0.10 mmol) in methanol (2 cm<sup>3</sup>) under argon was added potassium carbonate (0.028 g, 0.20 mmol). After stirring overnight the reaction mixture was evaporated to dryness and the residue purified by DCVC [id 4 cm; 20 cm<sup>3</sup> fractions; 0-100% EtOAc in petrol ether (60-80 °C) (v/v) – 10% increments] to give *azido-alcohol 25* as a clear light yellow oil (15 mg, 86%);  $[\alpha]_D^{22}$  –167.8 (c. 1.0, CHCl<sub>3</sub>);  $R_f$  0.40 [40% petrol ether (60-80 °C) in EtOAc, v/v]; <sup>1</sup>H NMR (500 MHz, CDCl<sub>3</sub>)  $\delta$  7.42-7.27 (5H, m, Ph), 4.30 (1H, d,  $J$  8.0, CHN<sub>3</sub>), 3.92-3.84 (1H, m, CHOH), 2.43 (1H, br s, OH), 1.03 (3H, d,  $J$  6.5, CH<sub>3</sub>); <sup>13</sup>C NMR (126 MHz, CDCl<sub>3</sub>)  $\delta$  136.6, 128.9, 128.7, 73.3, 70.8, 19.1;  $m/z$  (ESI+) found:  $MNa^+$  200.0792 ( $C_9H_{11}N_3ONa^+$  requires 200.7943).

**(1R,2R)-2-Azido-1,2-diphenylethanol 26**: to a stirred solution of azido-phosphinate **23** (0.060 g, 0.14 mmol) in methanol (3 cm<sup>3</sup>) under argon was added potassium carbonate (0.038 g, 0.27 mmol). After stirring overnight the reaction mixture was evaporated to dryness and the residue purified by DCVC [id 4 cm; 20 cm<sup>3</sup> fractions; 0-100% EtOAc in petrol ether (60-80 °C) (v/v) – 10% increments] to give *azido-alcohol 26* as a clear light yellow oil (19 mg, 57%);  $[\alpha]_D^{22}$  –85.4 (c. 0.85, CHCl<sub>3</sub>);  $R_f$  0.65 [40% petrol ether (60-80 °C) in EtOAc, v/v]; <sup>1</sup>H NMR (500 MHz, CDCl<sub>3</sub>)  $\delta$  7.26-7.17 (6H, m, Ph), 7.11-7.05 (4H, m, Ph), 4.74 (1H, d,  $J$  8.0, CH), 4.68 (1H, d,  $J$  7.5, CH), 2.79 (1H, br s, OH); <sup>13</sup>C NMR (126 MHz, CDCl<sub>3</sub>)  $\delta$  139.2, 136.0, 128.5, 128.2, 128.1 (×2), 127.8, 126.8, 78.0, 72.9;  $m/z$  (ESI+) found:  $MNa^+$  262.0943 ( $C_{14}H_{13}N_3ONa^+$  requires 262.0951). Data consistent with that previously reported.<sup>9</sup>

**(2R,3R)-2,3-Diphenyloxirane 27**: to a stirred solution of chloro-phosphinate **8** (0.200 g, 0.46 mmol) in methanol (10 cm<sup>3</sup>) under argon was added potassium carbonate (0.256 g, 1.85 mmol). After stirring overnight the reaction mixture was evaporated to dryness and the residue purified by DCVC [id 4 cm; 20 cm<sup>3</sup> fractions; 0-100% EtOAc in petrol ether (60-80 °C) (v/v) – 10% increments] to give epoxide **27** as white crystals (0.078 g, 86%);  $[\alpha]_D^{22}$  +250.8 (c. 0.85, CHCl<sub>3</sub>), (lit.  $[\alpha]_D^{22}$  +239.2).<sup>10</sup> NMR data



consistent with that previously reported.<sup>11</sup> The <sup>1</sup>H NMR spectrum of the crude product showed no trace of *cis*-epoxide product.

**(1*R*,2*S*)-2-Azido-1,2-diphenylethanol 28**: to a stirred solution of epoxide **27** (0.020 g, 0.10 mmol) in wet DMF (5 cm<sup>3</sup>) under argon was added sodium azide (0.054 g, 0.83 mmol) and the mixture was stirred at 100 °C. After 48 hours heating was stopped and half-saturated aqueous NaHCO<sub>3</sub> (20 cm<sup>3</sup>) was added. The mixture was extracted with EtOAc (3 × 20 cm<sup>3</sup>), the combined organic phases washed with sulfate buffer (20 cm<sup>3</sup>), saturated aqueous NaHCO<sub>3</sub> (20 cm<sup>3</sup>), dried with Na<sub>2</sub>SO<sub>4</sub>, filtered, and evaporated *in vacuo*. Purification by DCVC [id 4 cm; 20 cm<sup>3</sup> fractions; 0-100% EtOAc in petrol ether (60-80 °C) (v/v) – 10% increments] gave azido-alcohol **28** as a clear light yellow oil 0.018 g (75%); [ $\alpha$ ]<sub>D</sub><sup>22</sup> +67.8 (c. 0.90, CHCl<sub>3</sub>) (lit. [ $\alpha$ ]<sub>D</sub><sup>22</sup> +44)<sup>9</sup>; *R*<sub>f</sub> 0.30 [40% petrol ether (60-80 °C) in EtOAc, v/v]; <sup>1</sup>H NMR (500 MHz, CDCl<sub>3</sub>)  $\delta$  7.38-7.22 (10H, m, Ph), 4.71-4.59 (1H, br d, *J* 6.5, *CHOH*), 4.68 (1H, d, *J* 7.0, *CHN*<sub>3</sub>), 2.09 (1H, br d, *J* 2.5, *OH*); <sup>13</sup>C NMR (126 MHz, CDCl<sub>3</sub>)  $\delta$  139.6, 135.9, 128.7, 128.6, 128.4, 128.3, 128.0, 127.0, 77.0, 71.2; *m/z* (ESI+) found: MNa<sup>+</sup> 262.0939 (C<sub>14</sub>H<sub>13</sub>N<sub>3</sub>ONa<sup>+</sup> requires 262.0951). NMR data consistent with that previously reported.<sup>9</sup>

**(1'*R*,2'*R*,1''*S*)-{2'-[(1''-Hydroxy-1''-phenyl)-methyl]-cyclopropyl}-1-phenyl-methanone 30**: to a stirred solution of chloro-phosphinate **5** (0.049 g, 0.10 mmol) in methanol (2 cm<sup>3</sup>) under argon was added potassium carbonate (0.038 g, 0.27 mmol) and after stirring for 48 hours the reaction mixture was evaporated *in vacuo*. Purification by DCVC [id 4 cm; 20 cm<sup>3</sup> fractions; 0-100% EtOAc in petrol ether (60-80 °C) (v/v) – 10% increments] gave cyclopropane **30** as a white amorphous solid (0.020 g, 79%). Data consistent with that previously reported.<sup>12</sup>

**(1'*R*,2'*R*,1''*S*)-{2'-[(1''-Azido-1''-phenyl)-methyl]-cyclopropyl}-1-phenyl-methanone 31** and **(1'*S*,2'*R*,1''*S*)-{2'-[(1''-azido-1''-phenyl)-methyl]-cyclopropyl}-1-phenyl-methanone 32**: ketone **21** (0.13 g, 0.26 mmol) was dissolved in anhydrous THF (5 cm<sup>3</sup>) under argon and cooled to -78 °C. Freshly prepared LDA (0.27 mmol) in anhydrous THF (3 cm<sup>3</sup>) cooled to -78 °C was added by cannula and the reaction mixture stirred at -78 °C for 2 hours and then warmed to 0 °C. The reaction was maintained at 0 °C for 4 hours and then allowed to warm to room temperature overnight (16 hours). Saturated aqueous NH<sub>4</sub>Cl (10 cm<sup>3</sup>) was added and the mixture transferred to a separatory funnel with water (10 cm<sup>3</sup>) and extracted with CH<sub>2</sub>Cl<sub>2</sub> (3 × 25 cm<sup>3</sup>). The combined organic phases were dried with Na<sub>2</sub>SO<sub>4</sub>, filtered and concentrated *in vacuo* to give a yellow gum. The product was purified by DCVC [id 4 cm; 25 cm<sup>3</sup> fractions; 0-50% EtOAc in hexanes – 5% increments; two fractions of each solvent mixture were collected] to give 34 mg (47%) of *cyclopropanes* **31** and **32** in a 9:1 ratio. An analytically pure sample of cyclopropane **31** was obtained. Analytical data for cyclopropane **31**: [ $\alpha$ ]<sub>D</sub><sup>22</sup> -100 (c. 0.6, CHCl<sub>3</sub>); *R*<sub>f</sub> 0.35 (15% EtOAc in hexanes, v/v); *m/z* (+ESI) found: MNa<sup>+</sup>, 300.1106. C<sub>17</sub>H<sub>15</sub>N<sub>3</sub>ONa requires *M*, 300.1107; IR  $\nu_{\max}$ (CHCl<sub>3</sub>)/cm<sup>-1</sup> 2097 (N<sub>3</sub>) and 1669 (C=O); <sup>1</sup>H NMR (500 MHz; CDCl<sub>3</sub>)  $\delta$  7.87-7.85 (2H, m, *ortho*-PhC=O), 7.55 (1H, tt, *J* 7.5 and 1.0, *para*-PhC=O), 7.44-7.33 (5H, m, Ph), 4.40 (1H, d, *J* 6.5, PhCH), 2.68 (1H, dt, *J* 8.5 and 4.5, *CHC*=O), 2.11 (1H, dtd, *J* 8.5, 6.5 and 4.0,

CHCHN<sub>3</sub>), 1.63 (1H, ddd, *J* 9.0, 5.0 and 4.0, CH<sub>a</sub>H<sub>b</sub>), 1.32 (1H, ddd, *J* 8.5, 6.5 and 4.0, CH<sub>a</sub>H<sub>b</sub>); <sup>13</sup>C NMR (126 MHz; CDCl<sub>3</sub>) δ 198.6 (C1), 138.3, 137.5 (2 × *ipso*-Ph), 133.0, 128.9, 128.7, 128.5, 128.0, 127.1 (6 × Ph), 66.8 (C1''), 29.0 (C2'), 21.9 (C1') and 16.0 (C3'). NMR data for cyclopropane **32** (extracted from NMR spectra of a mixture of **31** and **32**. Peaks were overlapping in the aromatic region): <sup>1</sup>H NMR (500 MHz; CDCl<sub>3</sub>) δ 7.70-7.68 (2H, m, *ortho*-PhC=O), 7.44-7.33 (6H, m, Ph), 4.54 (1H, d, *J* 10.0, PhCH), 2.78 (1H, ddd, *J* 9.0, 7.5 and 5.5, CHC=O), 2.04 (1H, dtd, *J* 9.0, 8.5 and 7.0, CHCHN<sub>3</sub>), 1.84 (1H, ddd, *J* 7.0, 5.5 and 4.5, CH<sub>a</sub>H<sub>b</sub>), 1.44 (1H, td, *J* 8.0 and 4.5, CH<sub>a</sub>H<sub>b</sub>); <sup>13</sup>C NMR (126 MHz; CDCl<sub>3</sub>) δ 198.8 (C1), 139.2, 138.6 (2 × *ipso*-Ph), 132.7, 128.3, 127.8, 126.7, (4 × Ph, two phenyl peaks were overlapping with compound **31** peaks and could not be identified), 63.3 (C1''), 30.2 (C2'), 22.1 (C1') and 14.5 (C3').

Crystal data for chloro phosphinate **6**: C<sub>27</sub>H<sub>30</sub>ClO<sub>4</sub>P, *M* = 484.93, Orthorhombic, *P*2<sub>1</sub>2<sub>1</sub>2<sub>1</sub>, *a* = 5.8203(10), *b* = 11.4038(2), *c* = 37.8022(9) Å, α = 90°, β = 90°, γ = 90°, *U* = 2509.1(4) Å<sup>3</sup>, *Z* = 4, μ(Mo-Kα) = 0.247 mm<sup>-1</sup>, 10165 reflections collected at 180(2) K using an Oxford Cryosystems Cryostream cooling apparatus, 4316 unique (*R*<sub>int</sub> = 0.056); *R*1 = 0.053, *wR*2 = 0.127 [*I* > 2σ(*I*)], Absolute structure parameter 0.02(10).

The structure was solved with SHELXS-97,<sup>13</sup> and refined with SHELXL-97.<sup>13</sup> CCDC reference number 600429. See <http://www.rsc.org/suppdata> for crystallographic data in .cif or other electronic format.

#### References

- 1 D. S. Pedersen and C. Rosenbohm, *Synthesis*, 2001, 2431.
- 2 Mestre-C software, ver. 4.5.6, [www.mestrec.com](http://www.mestrec.com).
- 3 D. J. Fox, S. Parris, D. S. Pedersen, C. R. Tyzack, and S. Warren, *Org. Biomol. Chem.*, submitted. B606874J
- 4 D. J. Fox, D. S. Pedersen, and S. Warren, *Org. Biomol. Chem.*, submitted. B606879K
- 5 H. C. Kolb and K. B. Sharpless, *Tetrahedron*, 1992, **48**, 10515.
- 6 Z. M. Wang, H. C. Kolb, and K. B. Sharpless, *J. Org. Chem.*, 1994, **59**, 5104.
- 7 W. H. Pearson and M.-C. Cheng, *J. Org. Chem.*, 1987, **52**, 3176.
- 8 V. Chandrasekhar, T. Chivers, S. S. Kumaravel, A. Meetsma, and J. C. van de Grampel, *Inorg. Chem.*, 1991, **30**, 3402.
- 9 P. Lupattelli, C. Bonini, L. Caruso, and A. Gambacorta, *J. Org. Chem.*, 2003, **68**, 3360.
- 10 S. E. Denmark and H. Matsubashi, *J. Org. Chem.*, 2002, **67**, 3479.
- 11 P. C. B. Page, G. A. Rassias, D. Bethell, and M. B. Schilling, *J. Org. Chem.*, 1998, **63**, 2774.
- 12 T. Boesen, D. J. Fox, W. Galloway, D. S. Pedersen, C. R. Tyzack, and S. Warren, *Org. Biomol. Chem.*, 2005, **3**, 630.
- 13 G. M. Sheldrick, 'ver. SHELXS-97/SHELXL-97', University of Göttingen, Germany, 1997.
